# Supplementary material for: Multiparametric Mechanistic Profiling of Inotropic Drugs in Adult Human Primary Cardiomyocytes
Source: PubMed Central journal article supplement (PMC7203129; doi:10.1038/s41598-020-64657-2), 2020-05-06
Supplement: 41598_2020_64657_MOESM1_ESM.pdf [file 41598_2020_64657_MOESM1_ESM.pdf]

# Multiparametric Mechanistic Profiling of Inotropic Drugs in Adult Human Primary Cardiomyocytes

Najah Abi-Gerges<sup>1\*</sup>, Tim Indersmitten<sup>1</sup>, Ky Truong<sup>1</sup>, William Nguyen<sup>1</sup>,  
Phachareeya Ratchada<sup>1</sup>, Nathalie Nguyen<sup>1,2</sup>, Guy Page<sup>1</sup>, Paul E Miller<sup>1</sup>,  
Andre Ghetti<sup>1</sup>

<sup>1</sup> AnaBios Corporation, San Diego, CA 92109, USA

Running title: Human primary cardiomyocytes and drug discovery

\*Correspondence and requests for material should be addressed to:

Dr. Najah Abi-Gerges

3030 Bunker Hill St., Suite 312

San Diego, CA 92109 USA

Tel: +1 858-366-8374

Email: [Najah.abigergeres@anabios.com](mailto:Najah.abigergeres@anabios.com)

<sup>2</sup> Current address: Arena Pharmaceuticals, San Diego, CA 92121, USA

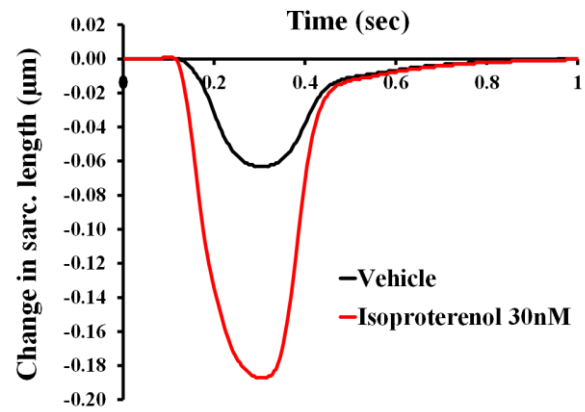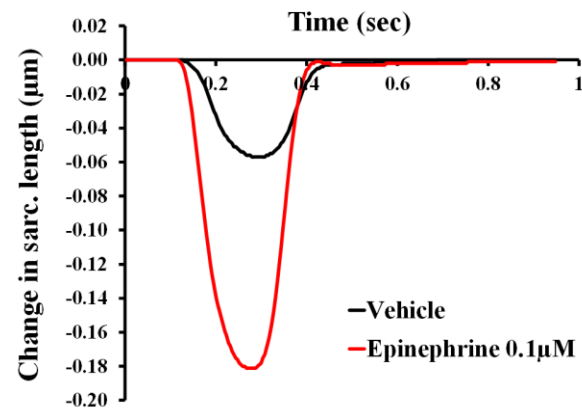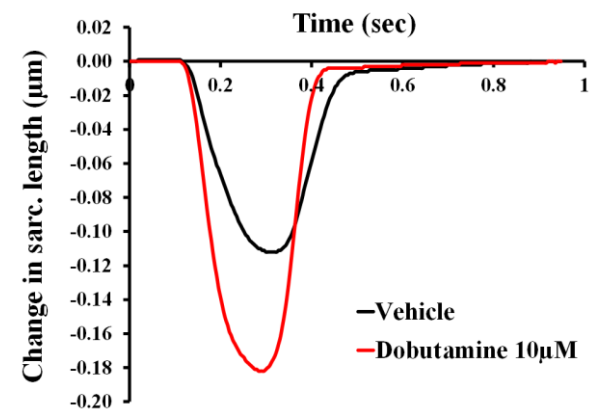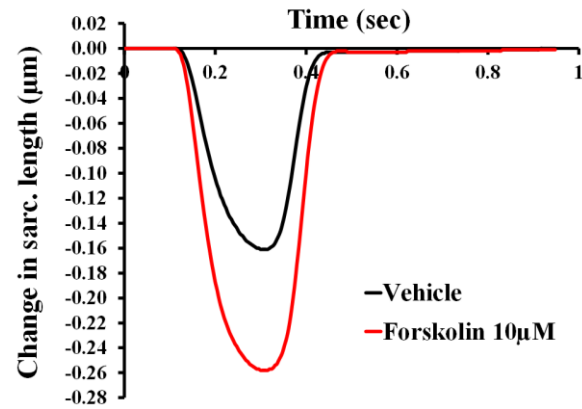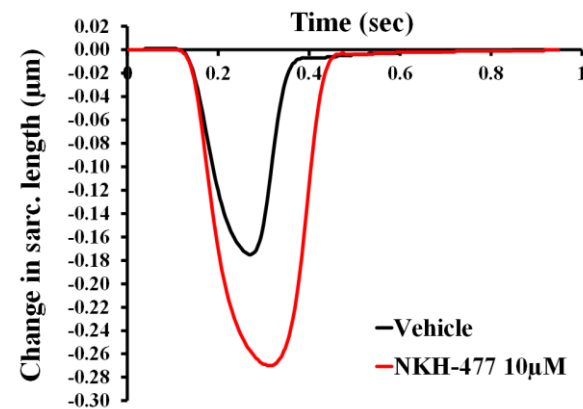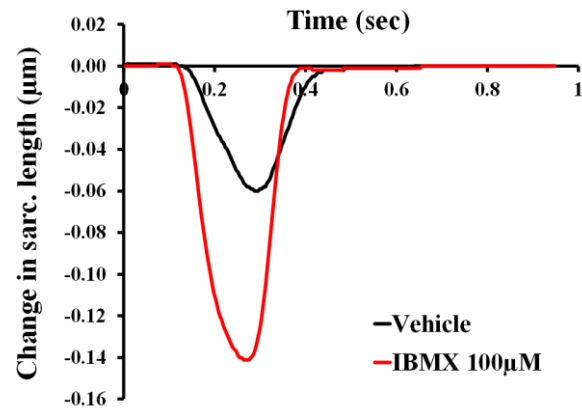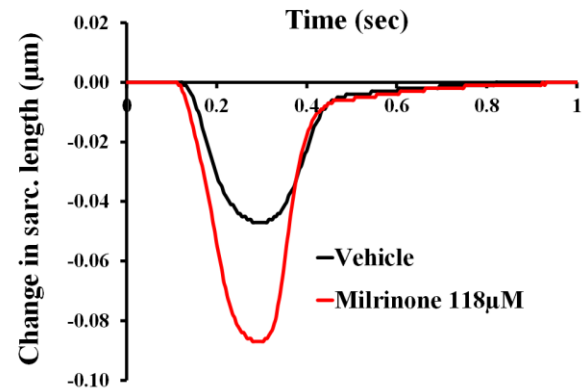

Supplementary Figure 1

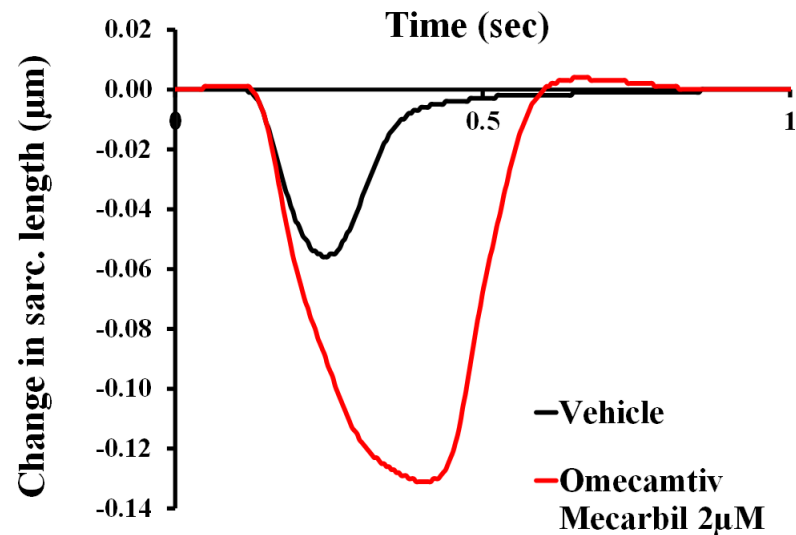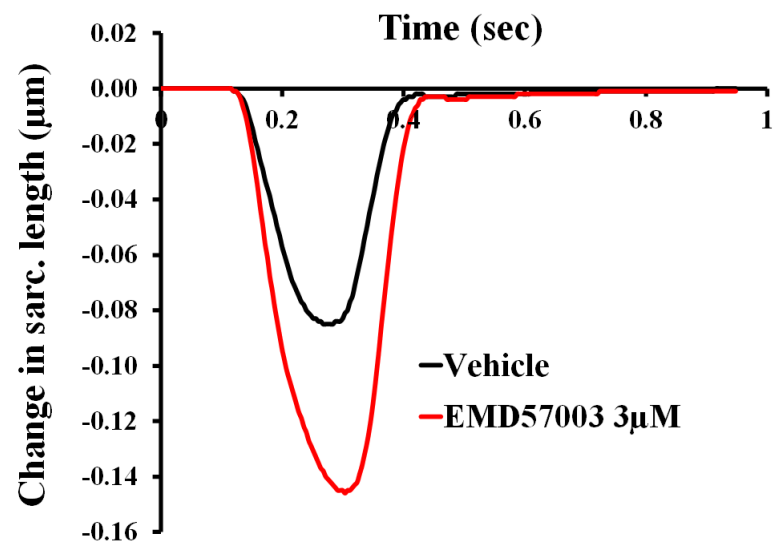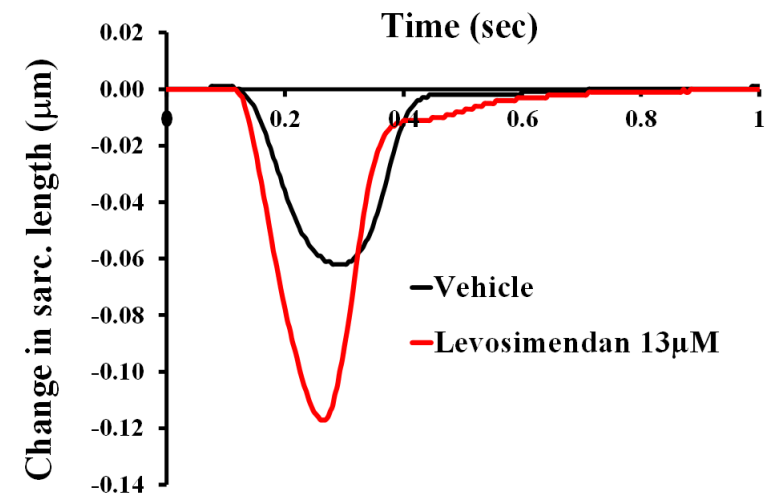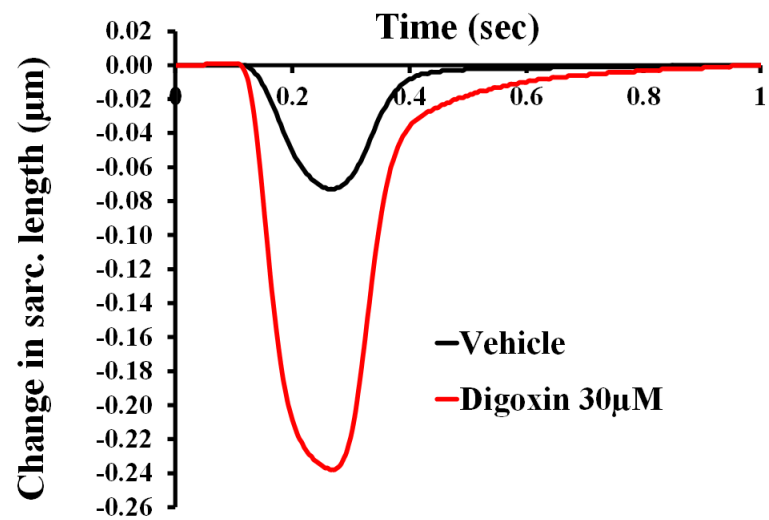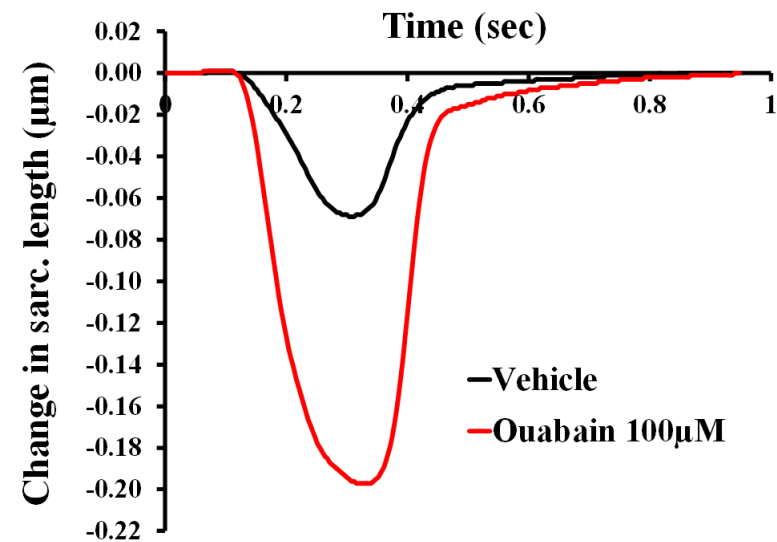

Supplementary Figure 2

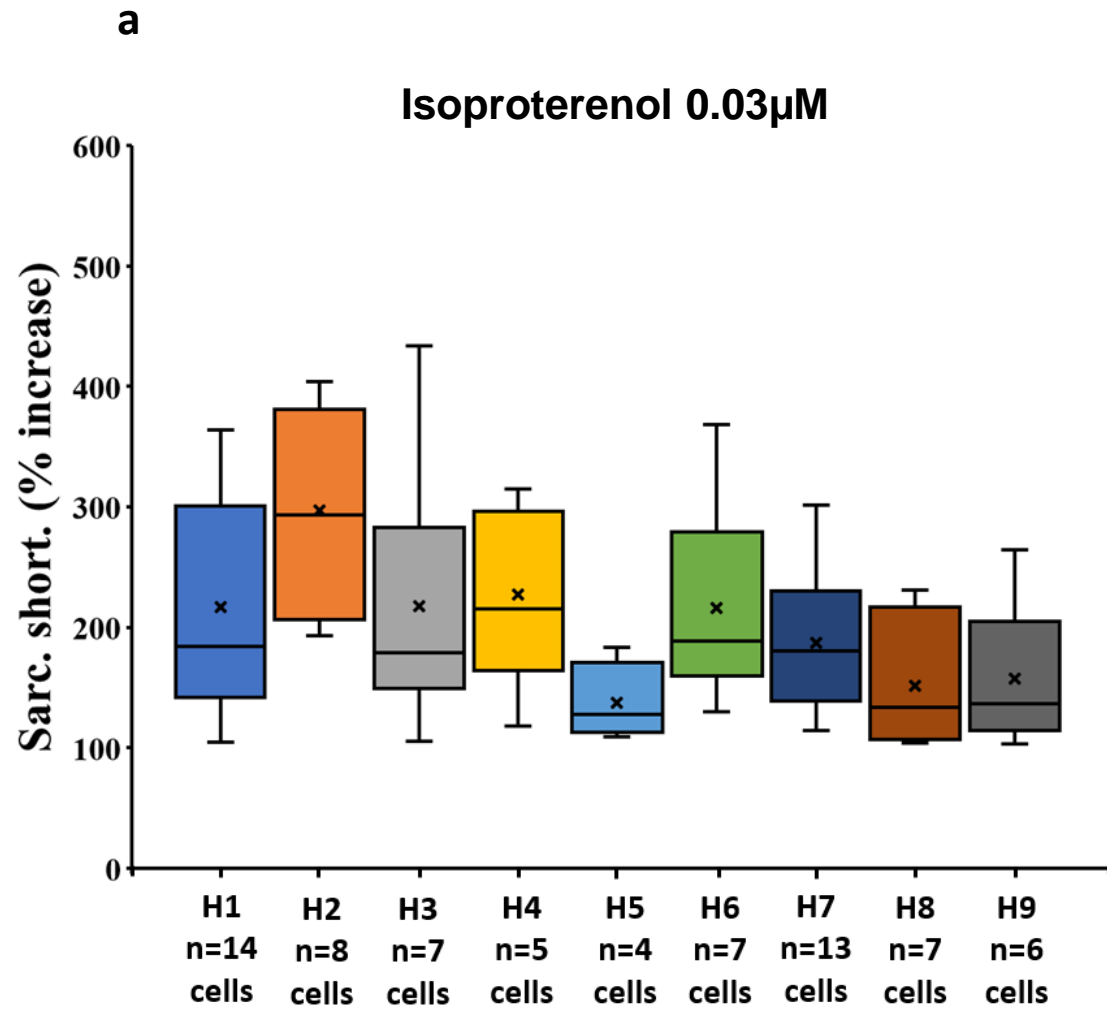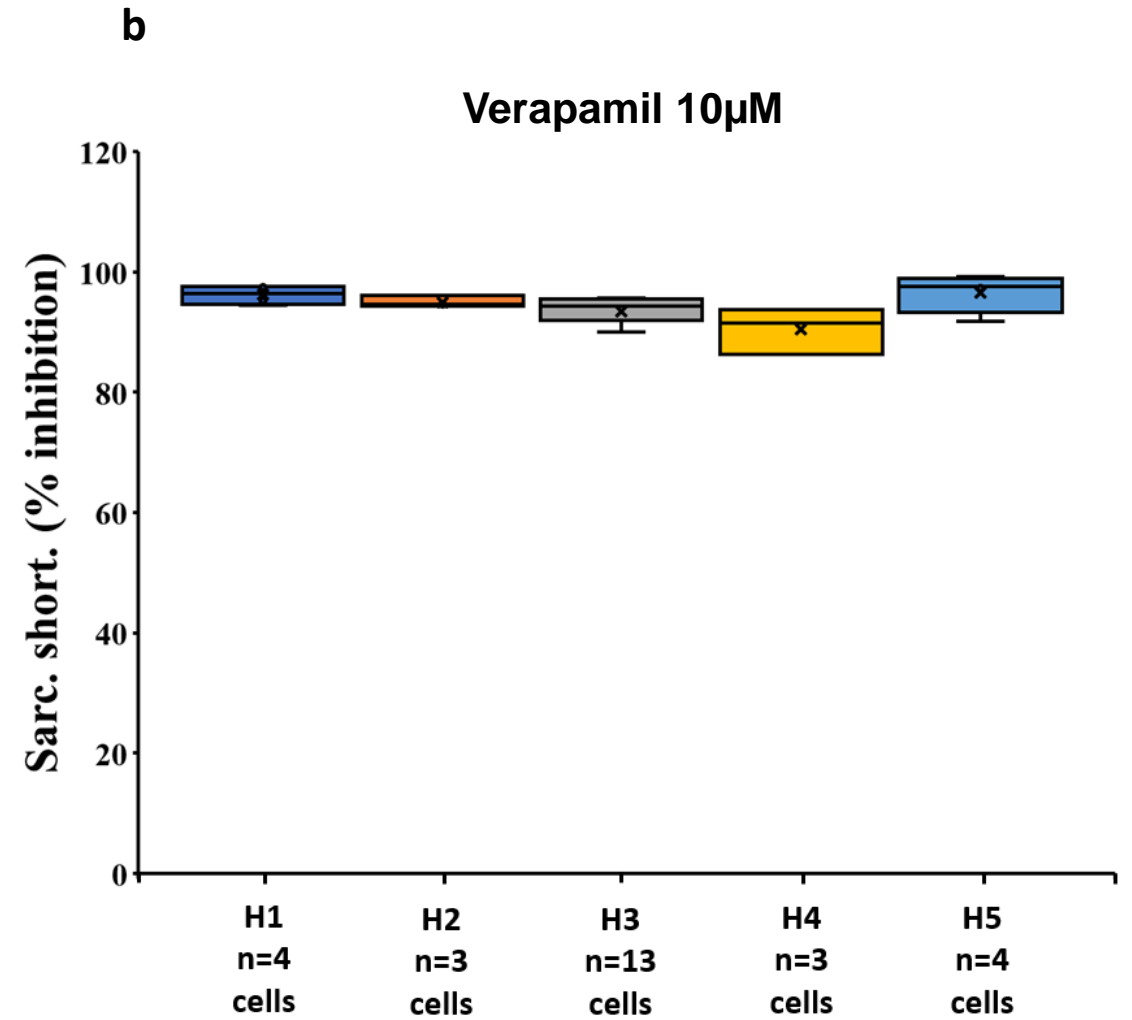

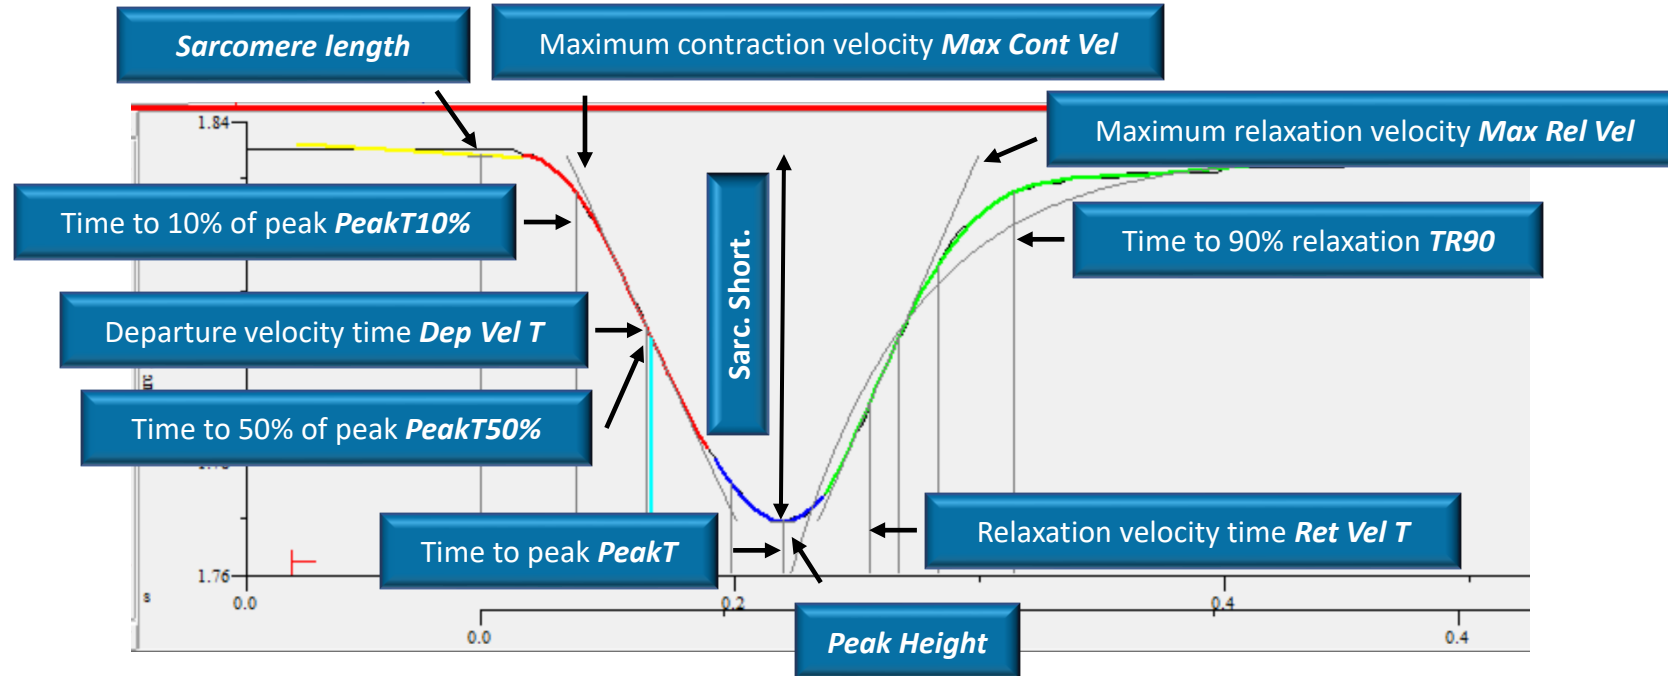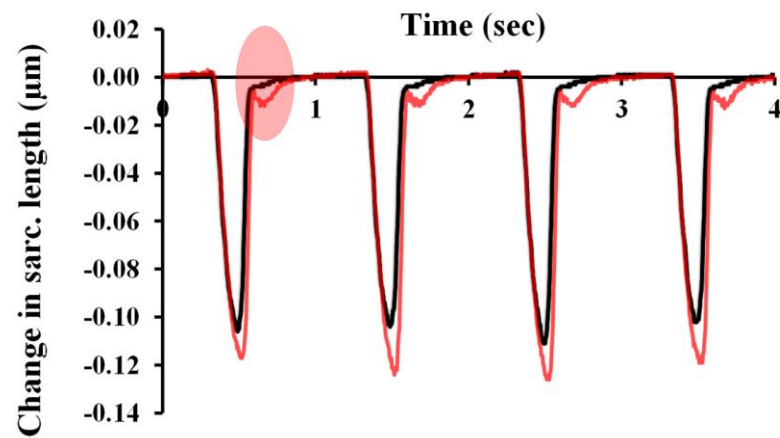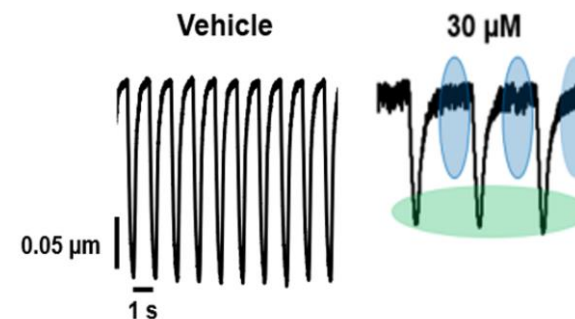

- AC
- CF
- Inotropy

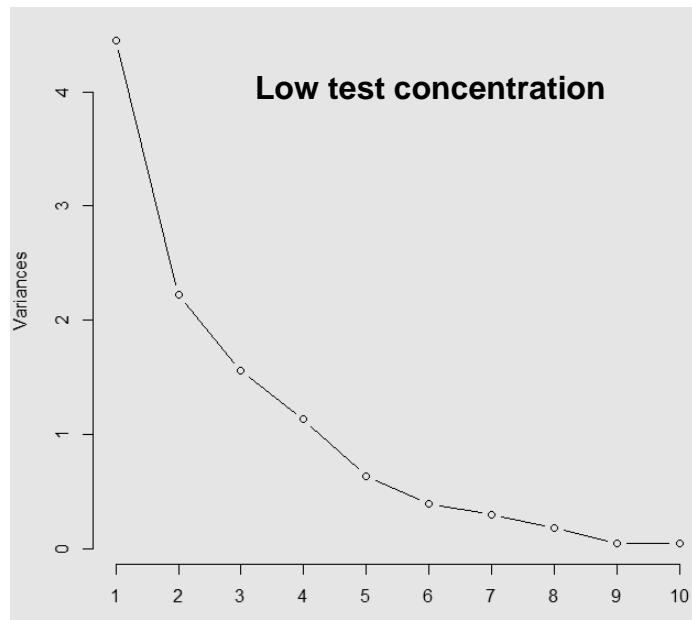

Principal component number

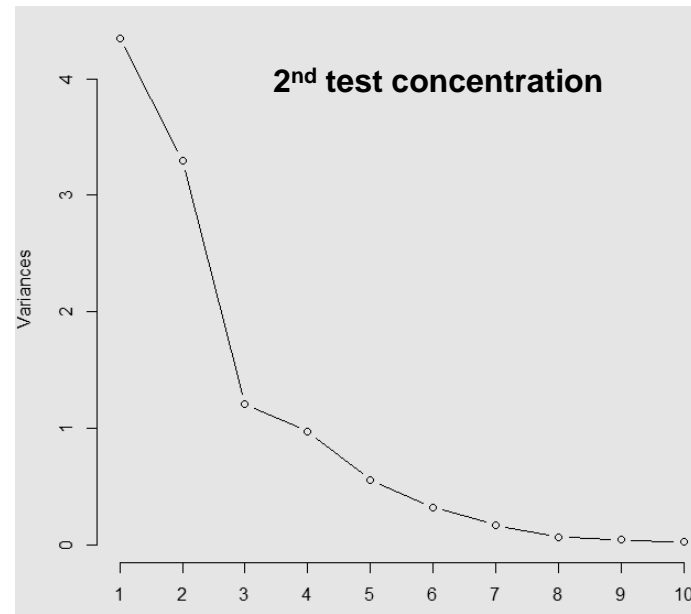

Principal component number

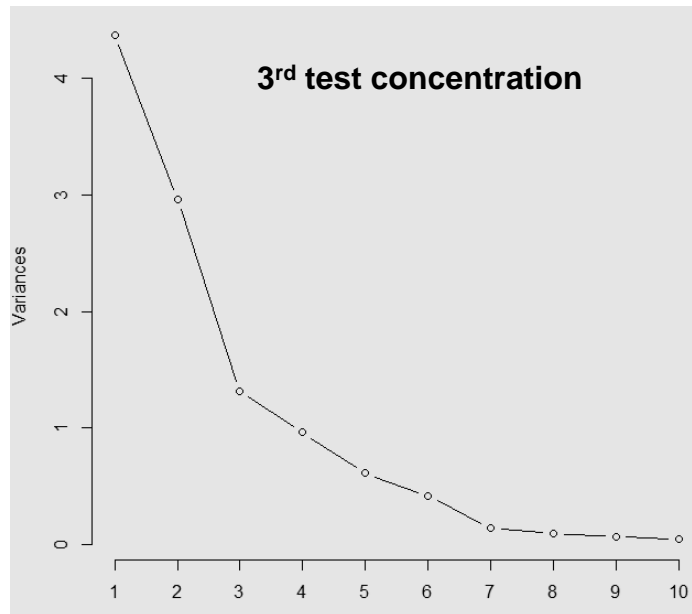

Principal component number

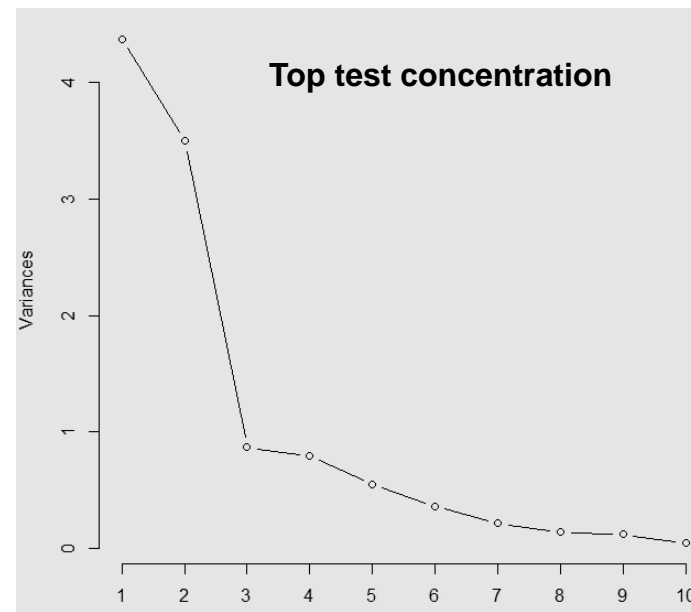

Principal component number

**Supplementary Table 1** Donor characteristics for 0.03 $\mu$ M Isoproterenol and 10 $\mu$ M Verapamil data

| Heart # | Donor identifier       | Age | Sex | Ethnicity        | BMI  | COD       | EF (%)           | Drug          | n  |
|---------|------------------------|-----|-----|------------------|------|-----------|------------------|---------------|----|
| 1       | 190912HHA              | 46  | M   | Hispanic         | 46.1 | CVA / ICH | 65               | Isoproterenol | 14 |
| 2       | 190920HHA              | 40  | M   | Caucasian        | 23.8 | CNS Tumor | N/A <sup>a</sup> | Isoproterenol | 8  |
| 3       | 190923HHA              | 33  | F   | Caucasian        | 18.9 | HT / BI   | 60               | Isoproterenol | 7  |
| 4       | 190925HHA              | 53  | F   | Caucasian        | 25.6 | CVA / ICH | 50               | Isoproterenol | 5  |
| 5       | 190929HHA              | 37  | M   | Hispanic         | 30.5 | Anoxia    | 60               | Isoproterenol | 4  |
| 6       | 191003HHA              | 56  | F   | Caucasian        | 24.7 | Anoxia    | 70               | Isoproterenol | 7  |
| 7       | 191010HHA              | 54  | F   | Hispanic         | 60.5 | CVA / ICH | 63               | Isoproterenol | 13 |
| 8       | 191021HHA              | 35  | F   | Caucasian        | 20.7 | Anoxia    | 65               | Isoproterenol | 7  |
| 9       | 191101HHB              | 44  | F   | Hispanic         | 23.9 | Anoxia    | 70               | Isoproterenol | 6  |
| 10      | 191202HHA              | 42  | M   | African American | 20.7 | CVA / ICH | 55               | Verapamil     | 4  |
| 11      | 180523HHA              | 32  | F   | Caucasian        | 23.5 | HT        | 63               | Verapamil     | 3  |
| 12      | 171025HHA <sup>b</sup> | 33  | M   | Caucasian        | 30.3 | CVA / ICH | 60               | Verapamil     | 13 |
| 13      | 161204HHA              | 23  | F   | Caucasian        | 19.5 | Anoxia    | 55               | Verapamil     | 3  |
| 14      | 160613HHB              | 32  | F   | Caucasian        | 20.5 | Anoxia    | 50               | Verapamil     | 4  |

F, Female; M, Male; BMI, Body Mass Index; COD, Cause Of Death; EF, Ejection Fraction; CVA, Cerebrovascular Accident; ICH, Intracranial Haemorrhage; CNS, Central Nervous System; HT, Head Trauma; BI, Blunt Injury; HH, Human Heart; HHA, the 1<sup>st</sup> heart received on the day; HHB, the 2<sup>nd</sup> heart received the same day; <sup>a</sup>Organ procurement organization could not transplant the heart and consequently no echocardiography was performed; N/A, Not available; n, Number of cells per donor heart. <sup>b</sup>See Table 1.

**Supplementary Table 2: Inotropes tested in adult human primary cardiomyocyte contractility-based model**

| Drug name                 | Inotropic effect  | Mechanism of action                                    | Concentrations tested ( $\mu\text{M}$ ) |       |       |       | Cells # | Heart # <sup>a</sup> |
|---------------------------|-------------------|--------------------------------------------------------|-----------------------------------------|-------|-------|-------|---------|----------------------|
| Digoxin                   | Positive          | Na <sup>+</sup> /K <sup>+</sup> pump inhibition        | 0.9                                     | 3     | 9     | 30    | 7       | 2                    |
| Ouabain                   | Positive          | Na <sup>+</sup> /K <sup>+</sup> pump inhibition        | 0.1                                     | 1     | 10    | 100   | 5       | 6                    |
| SEA-0400                  | Positive          | Na <sup>+</sup> /Ca <sup>2+</sup> exchanger inhibition | 0.1                                     | 1     | 3     | 10    | 5       | 3                    |
| Omecamtiv mecarbil        | Positive          | Myosin activation                                      | 0.02                                    | 0.2   | 2     | 20    | 5       | 2                    |
| EMD-57003                 | Positive          | Myosin activation                                      | 0.1                                     | 0.3   | 1     | 3     | 5       | 6                    |
| Levosimendan              | Positive          | Ca <sup>2+</sup> sensitization                         | 0.13                                    | 1.3   | 3.9   | 13    | 4       | 2                    |
| Isoproterenol             | Positive          | $\beta$ -adrenoceptor activation                       | 0.0003                                  | 0.003 | 0.01  | 0.03  | 4       | 1                    |
| Epinephrine               | Positive          | $\beta$ -adrenoceptor activation                       | 0.001                                   | 0.01  | 0.03  | 0.1   | 4       | 6                    |
| Dobutamine                | Positive          | $\beta$ 1-adrenoceptor activation                      | 0.01                                    | 0.1   | 1     | 10    | 5       | 5                    |
| Milrinone                 | Positive          | PDE3 inhibition                                        | 3.5                                     | 11.8  | 35    | 118   | 4       | 1                    |
| IBMX                      | Positive          | PDE inhibition                                         | 1                                       | 10    | 30    | 100   | 5       | 6                    |
| Bay-K 8644                | Positive          | Ca <sup>2+</sup> channel activation                    | 0.01                                    | 0.03  | 0.1   | 0.3   | 5       | 5                    |
| Forskolin                 | Positive          | Adenylyl cyclase activation                            | 0.001                                   | 0.01  | 0.03  | 0.1   | 5       | 6                    |
| NKH-477                   | Positive          | Adenylyl cyclase activation                            | 0.1                                     | 1     | 10    | 30    | 6       | 6                    |
| N106                      | Positive          | SERCA activation                                       | 0.01                                    | 0.1   | 1     | 10    | 5       | 5                    |
| Caffeine                  | Positive          | RyR activation                                         | 10                                      | 100   | 1000  | 10000 | 5       | 4, 7                 |
| Ryanodine                 | Negative          | RyR inhibition                                         | 0.01                                    | 0.1   | 1     | 10    | 4       | 5                    |
| Thapsigargin              | Negative          | SERCA inhibition                                       | 0.1                                     | 1     | 10    | 30    | 4       | 2                    |
| Flecainide <sup>9</sup>   | Negative          | Na <sup>+</sup> channel inhibition                     | 0.75                                    | 2.26  | 7.53  | 22.6  | 3       | 8                    |
| Mexiletine <sup>9</sup>   | Negative          | Na <sup>+</sup> channel inhibition                     | 0.25                                    | 2.5   | 25    | 75    | 7       | 9                    |
| Diltiazem <sup>9</sup>    | Negative          | Ca <sup>2+</sup> channel inhibition                    | 0.13                                    | 0.38  | 1.28  | 3.84  | 4       | 8                    |
| Mibefradil <sup>9</sup>   | Negative          | Ca <sup>2+</sup> channel inhibition                    | 0.012                                   | 0.036 | 0.12  | 0.36  | 6       | 10                   |
| Nifedipine <sup>9</sup>   | Negative          | Ca <sup>2+</sup> channel inhibition                    | 0.007                                   | 0.023 | 0.077 | 0.23  | 4       | 10                   |
| Nitrendipine <sup>9</sup> | Negative          | Ca <sup>2+</sup> channel inhibition                    | 0.003                                   | 0.009 | 0.03  | 0.09  | 4       | 8                    |
| Verapamil                 | Negative          | Ca <sup>2+</sup> channel inhibition                    | 0.01                                    | 0.1   | 1     | 10    | 5       | 1                    |
| CaCl <sub>2</sub>         | Negative/positive | Hypocalcaemia/hypercalcemia                            | 300                                     | 1000  | 3000  | 10000 | 5       | 5                    |

<sup>9</sup>Nguyen N. et al., 2017; #, Number; <sup>a</sup>See Table 1 for Donor Characteristics.
